# Supplementary material
Source: publisher figshare collection journal article supplement (https://diabetesjournals.figshare.com/ndownloader/files/34789162)
Supplement: Supplementary file 1 [file 34789162]

## Sheet: 9A. 54 sites in SIDD-MRS
Table S9. DNA methylation levels of the 95 subgroup-unique sites included in the subgroup-unique methylation risk scores (MRSs) in the ANDIS discovery cohort.
Table S9A. DNA methylation levels of the 54 sites included in SIDD-MRS.
					ANDIS discovery cohort (n=280)
					SIDD (n=78)		SIRD (n=47)		MOD (n=67)		MARD (n=88)						Methylation differences between subgroups
TargetID	Chr	Gene	Gene region	CpG island group	Mean	SD	Mean	SD	Mean	SD	Mean	SD	ANCOVA q-value	p-value SIDD vs. SIRD	p-value SIDD vs. MOD	p-value SIDD vs. MARD	SIDD-MARD	SIRD-MARD	MOD-MARD	SIDD- SIRD	SIDD-MOD	SIRD-MOD
cg19693031	1	TXNIP	3'UTR	open_sea	58.77	7.63	66.37	6.14	64.96	6.48	66.86	7.24	2.65227e-10	2.91385e-07	1.32708e-05	1.1821e-10	-8.09	-0.49	-1.9	-7.6	-6.19	1.41
cg14013597	2		intergenic	Island	82.38	10.22	89.5	7.46	88.4	6.87	85.84	9.2	0.000965723	2.00374e-05	0.000511696	0.042121	-3.46	3.66	2.56	-7.12	-6.02	1.1
cg02565102	18		intergenic	open_sea	90.02	2.55	91.29	1.92	91.54	2.45	91.66	2.38	0.00168601	0.040441	0.000414253	3.59253e-05	-1.64	-0.37	-0.12	-1.27	-1.52	-0.25
cg21497450	9		intergenic	open_sea	87.21	2.64	85.4	2.6	85.85	2.29	85.43	3.18	0.00344271	0.00157314	0.0110854	0.000387082	1.78	-0.03	0.42	1.81	1.36	-0.45
cg15225267	6		intergenic	N_Shore	18.86	5.61	15.1	5.64	15.51	4.55	16.72	5.55	0.00467641	0.000132289	0.000319607	0.0114136	2.14	-1.62	-1.21	3.76	3.35	-0.41
cg17106100	2		intergenic	open_sea	78.39	6.41	82.52	4.26	81.54	4.23	81.38	5.67	0.00492505	0.000627105	0.0173685	0.00899697	-2.99	1.14	0.16	-4.13	-3.15	0.98
cg11447186	19	LMNB2	Body	N_Shelf	91.86	1.4	92.74	1.29	92.76	1.57	92.65	1.35	0.00534144	0.00418146	0.000306818	0.00160541	-0.79	0.09	0.11	-0.88	-0.9	-0.02
cg26325791	19	MAST3	Body	Island	83.55	6.23	79.73	6.34	79.15	6.72	79.64	6.62	0.00557462	0.0113584	0.000889641	0.00146299	3.91	0.09	-0.49	3.82	4.4	0.58
cg23616741	7	PGAM2	TSS1500	S_Shore	47.43	6.73	51.62	8	52.63	8.02	51.84	8.13	0.0057111	0.0426091	0.00181806	0.0114379	-4.41	-0.22	0.79	-4.19	-5.2	-1.01
cg17394535	17	PITPNM3	Body	open_sea	54.87	5.95	58.05	6.19	58.82	5.29	58.58	6.32	0.00572621	0.0418827	0.00201456	0.00219087	-3.71	-0.53	0.24	-3.18	-3.95	-0.77
cg10927968	11		intergenic	open_sea	76.12	3.56	73.7	4	74.04	3.73	73.59	4.23	0.00648066	0.00391247	0.00527603	0.000135276	2.53	0.11	0.45	2.42	2.08	-0.34
cg20396289	7		intergenic	open_sea	80.22	4.92	77.4	5.44	77.78	4.42	76.93	5.28	0.00653883	0.0183619	0.0203361	0.000413761	3.29	0.47	0.85	2.82	2.44	-0.38
cg02304370	11	PHRF1	Body	N_Shore	42.88	4.82	40.5	4.93	39.96	4.5	40.1	3.95	0.00708235	0.0469485	0.00246871	0.00271692	2.78	0.4	-0.14	2.38	2.92	0.54
cg24566687	12	C1QL4	TSS200	Island	4.91	0.72	5.42	0.72	5.42	0.79	5.23	0.83	0.00739688	0.00158073	0.000249431	0.0258787	-0.32	0.19	0.19	-0.51	-0.51	0
cg03567838	9	GALT	TSS1500	N_Shore	83.75	4.93	86.82	4.25	86.4	3.41	86.31	4.94	0.00791068	0.00137684	0.00838638	0.000940377	-2.56	0.51	0.09	-3.07	-2.65	0.42
cg09956037	11	LSP1	5'UTR;Body	N_Shelf	82.55	2.46	80.97	2.11	81.17	2.38	81.37	2.39	0.00879174	0.00239501	0.00749132	0.0253778	1.18	-0.4	-0.2	1.58	1.38	-0.2
cg02218802	1	C1orf167	Body	open_sea	79.12	5.45	81.7	4.58	82.21	3.56	81.82	4.15	0.00901142	0.0196113	0.00114053	0.00281697	-2.7	-0.12	0.39	-2.58	-3.09	-0.51
cg22891868	2	MOGAT1	TSS1500	N_Shore	25.45	4.39	29.13	6.63	28.32	4.9	29.01	6.4	0.00935568	0.00536162	0.0199117	0.00113907	-3.56	0.12	-0.69	-3.68	-2.87	0.81
cg01629231	2	INO80D	TSS200	S_Shore	6.57	0.82	7.06	0.9	7.14	0.93	6.98	0.82	0.00936333	0.0156205	0.000945072	0.0231682	-0.41	0.08	0.16	-0.49	-0.57	-0.08
cg07907254	19	PIP5K1C	Body	open_sea	48.12	7.26	51.91	7.27	52.93	6.4	51.11	6.3	0.00988686	0.0184226	0.000192526	0.0328411	-2.99	0.8	1.82	-3.79	-4.81	-1.02
cg07053618	18		intergenic	open_sea	93.93	1.54	92.96	1.65	92.86	1.71	93.23	1.68	0.0101409	0.00660046	0.000705405	0.0354743	0.7	-0.27	-0.37	0.97	1.07	0.1
cg07304652	2	CAB39	Body	open_sea	89.81	2.33	88.11	2.42	88.76	2.28	88.79	2.17	0.0106264	0.000382678	0.0307326	0.0230754	1.02	-0.68	-0.03	1.7	1.05	-0.65
cg04787317	3	CTDSPL;MIR26A1	Body;TSS1500	open_sea	94.3	0.9	93.58	0.96	93.71	1.13	93.77	1.06	0.0109002	0.00101859	0.00660325	0.0103137	0.53	-0.19	-0.06	0.72	0.59	-0.13
cg26971256	10	DNAJC12	Body	open_sea	94.6	1.82	93.52	1.66	93.87	1.75	93.57	2.07	0.0127769	0.00300168	0.0425653	0.00179867	1.03	-0.05	0.3	1.08	0.73	-0.35
cg06955919	8	EBAG9	TSS1500;TSS200	Island	6.29	1.05	7.08	1.09	6.87	1.15	6.84	1.23	0.0130074	0.000827991	0.013408	0.013866	-0.55	0.24	0.03	-0.79	-0.58	0.21
cg18761958	22		intergenic	S_Shore	57.73	7.15	60.61	4.83	61.66	4.04	60.62	5.63	0.0130979	0.0435895	0.00031163	0.0070754	-2.89	-0.01	1.04	-2.88	-3.93	-1.05
cg10944297	8	STK3	TSS1500;Body	S_Shore	93.74	1.76	92.54	2.16	92.66	1.62	92.78	2.06	0.0132121	0.00434727	0.000739947	0.0037598	0.96	-0.24	-0.12	1.2	1.08	-0.12
cg14578612	1	KCNAB2	Body	Island	93.19	1.69	92.24	1.64	92.32	1.87	92.41	1.38	0.0141678	0.00316111	0.00406844	0.00167088	0.78	-0.17	-0.09	0.95	0.87	-0.08
cg17964046	6		intergenic	open_sea	4.9	0.77	5.39	0.77	5.4	0.9	5.35	0.86	0.014282	0.00652523	0.00193712	0.00290679	-0.45	0.04	0.05	-0.49	-0.5	-0.01
cg21878918	12	NDUFA4L2	TSS1500	N_Shore	4.5	0.81	5.16	1.02	4.96	0.89	4.94	0.92	0.0146934	0.000966222	0.0137175	0.0120276	-0.44	0.22	0.02	-0.66	-0.46	0.2
cg19571645	10	LOC101929431;CCDC7	Body;TSS1500	open_sea	43.03	4.54	40.14	4.64	40.47	4.06	40.43	5	0.0153539	0.00776089	0.0162801	0.00667896	2.6	-0.29	0.04	2.89	2.56	-0.33
cg02789526	16	A2BP1	Body	N_Shelf	89.16	5.08	91.69	2.89	91.53	2.68	91.24	3.84	0.0164908	0.0112803	0.0420606	0.0419953	-2.08	0.45	0.29	-2.53	-2.37	0.16
cg13930790	19	NCLN	1stExon	Island	5.38	0.79	4.89	0.7	5.01	0.75	4.93	0.78	0.017072	0.0048825	0.0291464	0.00108693	0.45	-0.04	0.08	0.49	0.37	-0.12
cg15081033	3	SPSB4	Body	open_sea	93.59	1.24	92.75	1.35	92.99	1.14	93.03	1.23	0.0206441	0.00164999	0.0151708	0.018498	0.56	-0.28	-0.04	0.84	0.6	-0.24
cg05963087	13	ENOX1	5'UTR	open_sea	95.05	1.35	94.06	1.35	94.44	1.45	94.53	1.46	0.0209904	0.000325275	0.0228072	0.0449999	0.52	-0.47	-0.09	0.99	0.61	-0.38
cg19942083	12		intergenic	open_sea	31.12	4.53	28.72	3.74	28.98	3.57	28.63	4.07	0.0212549	0.0134478	0.0135899	0.000594477	2.49	0.09	0.35	2.4	2.14	-0.26
cg03230144	2		intergenic	open_sea	94.82	1.39	94.09	1.47	93.87	1.54	94.03	1.81	0.0213611	0.0366638	0.000747457	0.00520585	0.79	0.06	-0.16	0.73	0.95	0.22
cg05295286	6	RREB1	Body	S_Shelf	88.14	3.17	86.08	4.2	85.74	3.05	86.3	4.81	0.0231503	0.0446919	0.000691005	0.0444195	1.84	-0.22	-0.56	2.06	2.4	0.34
cg25356393	20	KCNQ2	Body	Island	77.38	7.66	72.49	9.67	71.82	9.05	72.58	10.24	0.0266348	0.0306652	0.00177266	0.00907894	4.8	-0.09	-0.76	4.89	5.56	0.67
cg13379325	20	KCNQ2	Body	Island	52.12	10.98	44.02	12.67	44.91	12.95	45.76	14.21	0.0271116	0.00581311	0.00628964	0.0103186	6.36	-1.74	-0.85	8.1	7.21	-0.89
cg16651262	2	BRE;RBKS;LOC100302650	5'UTR;TSS1500	S_Shore	93.89	1.27	92.98	1.54	93.32	1.18	93.3	1.35	0.0278047	0.0013198	0.0229107	0.0124053	0.59	-0.32	0.02	0.91	0.57	-0.34
cg05664105	10	GRK5	Body	open_sea	94.48	1.24	93.67	1.44	93.76	1.33	93.8	1.51	0.0290806	0.00707362	0.00614264	0.0102179	0.68	-0.13	-0.04	0.81	0.72	-0.09
cg04733826	7		intergenic	S_Shelf	3.38	0.51	3.74	0.55	3.69	0.63	3.64	0.6	0.0303365	0.00405156	0.0121944	0.0412661	-0.26	0.1	0.05	-0.36	-0.31	0.05
cg11143857	1	SYT2	3'UTR	open_sea	94.2	1.35	93.47	1.66	93.44	1.53	93.35	1.48	0.0303635	0.0467679	0.00623445	0.000599111	0.85	0.12	0.09	0.73	0.76	0.03
cg09130434	20		intergenic	open_sea	4.99	0.69	5.48	0.66	5.35	0.75	5.32	0.8	0.0308994	0.00163048	0.0174568	0.0231055	-0.33	0.16	0.03	-0.49	-0.36	0.13
cg06901492	3	OXNAD1;DPH3	5'UTR;TSS1500	S_Shore	94.15	1.59	93.09	1.67	93.44	1.58	93.4	1.93	0.0310608	0.00176364	0.0246622	0.0105296	0.75	-0.31	0.04	1.06	0.71	-0.35
cg17094383	19	SMARCA4	Body	S_Shore	97.02	0.72	96.46	0.9	96.65	0.77	96.63	0.93	0.0319024	0.00224515	0.0319294	0.0261617	0.39	-0.17	0.02	0.56	0.37	-0.19
cg26649993	9	GSN	5'UTR;1stExon;Body	Island	4	0.86	4.47	0.84	4.36	0.73	4.36	0.76	0.0336865	0.0054376	0.0186778	0.00980604	-0.36	0.11	0	-0.47	-0.36	0.11
cg08291045	16		intergenic	open_sea	2.73	0.38	2.97	0.45	2.95	0.39	2.91	0.43	0.0367648	0.00858936	0.00400736	0.0288874	-0.18	0.06	0.04	-0.24	-0.22	0.02
cg23639734	4	SOD3	TSS1500	open_sea	83.44	2.57	81.45	3.12	82.18	2.9	82.12	3.05	0.0374397	0.000884785	0.0226265	0.00686474	1.32	-0.67	0.06	1.99	1.26	-0.73
cg04070007	10	CELF2	Body	open_sea	19.81	4.3	17.37	4.41	17.81	3.66	17.63	4.7	0.0382103	0.00978604	0.0385579	0.00270051	2.18	-0.26	0.18	2.44	2	-0.44
cg16276209	17	AATK	Body	open_sea	92.81	3.08	90.89	3.83	91.28	3.68	91.13	3.84	0.0382677	0.00764584	0.0144651	0.00439951	1.68	-0.24	0.15	1.92	1.53	-0.39
cg09635541	4	CPLX1	Body	Island	80.5	4.76	83.2	5.03	82.8	4.2	82.69	4.34	0.0391686	0.00778175	0.0434109	0.0372834	-2.19	0.51	0.11	-2.7	-2.3	0.4
cg05028010	1	TXNIP;NBPF20;NBPF10	TSS1500;Body	open_sea	3.88	0.5	4.17	0.47	4.13	0.54	4.13	0.5	0.0432139	0.00907898	0.0206638	0.00950894	-0.25	0.04	0	-0.29	-0.25	0.04

## Sheet: 9B. 2 sites in SIRD-MRS
Table S9. DNA methylation levels of the 95 subgroup-unique sites included in the subgroup-unique methylation risk scores (MRSs) in the ANDIS discovery cohort.
Table S9B. DNA methylation levels of the 2 sites included in SIRD-MRS.
					ANDIS discovery cohort (n=280)
					SIDD (n=78)		SIRD (n=47)		MOD (n=67)		MARD (n=88)						Methylation differences between subgroups
TargetID	Chr	Gene	Gene region	CpG island group	Mean	SD	Mean	SD	Mean	SD	Mean	SD	ANCOVA q-value	p-value SIRD vs. SIDD	p-value SIRD vs. MOD	p-value SIRD vs. MARD	SIDD-MARD	SIRD-MARD	MOD-MARD	SIDD- SIRD	SIDD-MOD	SIRD-MOD
cg07207090	18	RAB27B	TSS1500	N_Shore	38.27	5.57	34.62	5.21	40.13	6	37.39	5.07	0.000404105	0.00217647	1.88974e-06	0.0332965	0.88	-2.77	2.74	3.65	-1.86	-5.51
cg00000029	16	RBL2	TSS1500	N_Shore	45.66	5.78	42.16	6.33	47.84	4.93	45.29	6.34	0.000938921	0.00515727	5.64538e-06	0.0344342	0.37	-3.13	2.55	3.5	-2.18	-5.68

## Sheet: 9C 31 sites in MOD-MRS
Table S9. DNA methylation levels of the 95 subgroup-unique sites included in the subgroup-unique methylation risk scores (MRSs) in the ANDIS discovery cohort.
Table 9C. DNA methylation levels of the 31 sites included in MOD-MRS.
					ANDIS discovery cohort (n=280)
					SIDD (n=78)		SIRD (n=47)		MOD (n=67)		MARD (n=88)						Methylation differences between subgroups
TargetID	Chr	Gene	Gene region	CpG island group	Mean	SD	Mean	SD	Mean	SD	Mean	SD	ANCOVA q-value	p-value MOD vs. SIDD	p-value MOD vs. SIRD	p-value MOD vs. MARD	SIDD-MARD	SIRD-MARD	MOD-MARD	SIDD- SIRD	SIDD-MOD	SIRD-MOD
cg16867657	6	ELOVL2	TSS1500	Island	69.5	6.46	72.26	6.2	65.03	5.59	73.39	5.99	2.61454e-12	0.000192964	2.16613e-08	2.60558e-14	-3.89	-1.13	-8.36	-2.76	4.47	7.23
cg07082267	16		intergenic	open_sea	36.01	3.64	34.85	3.59	38.64	3.01	33.98	3.34	5.51943e-12	5.2057e-05	1.22071e-07	1.94668e-14	2.03	0.87	4.66	1.16	-2.63	-3.79
cg26081188	11	NAV2	Body	open_sea	14.28	2.64	13.24	2.64	16.41	2.05	13.3	2.37	1.00995e-11	6.35815e-06	4.1607e-10	8.64363e-13	0.98	-0.06	3.11	1.04	-2.13	-3.17
cg22067988	6	TFEB	Body;5'UTR	N_Shore	11.1	2.41	10.23	2.67	13.04	2.3	9.96	2.28	1.21834e-11	0.000152599	1.40894e-08	1.19823e-13	1.14	0.27	3.08	0.87	-1.94	-2.81
cg19965693	2	IFIH1	TSS1500	open_sea	30.27	4.82	28.87	4.18	33.1	4.05	27.4	4.38	1.66364e-10	0.00130516	1.00945e-05	3.55697e-13	2.87	1.47	5.7	1.4	-2.83	-4.23
cg24724428	6	ELOVL2	TSS1500	Island	26.02	5.16	27.92	5.39	22.76	4.02	29.34	6.04	1.90563e-10	0.000403615	9.49391e-07	1.02764e-12	-3.32	-1.42	-6.58	-1.9	3.26	5.16
cg19518666	4	PDGFC	Body	open_sea	50.14	5.62	49.16	7.03	55.11	5.16	47.78	5.65	2.3528e-10	8.74075e-06	1.31597e-06	6.11572e-13	2.36	1.38	7.33	0.98	-4.97	-5.95
cg05207637	16		intergenic	open_sea	49.86	5.26	48.61	5.35	54.34	4.55	48.29	5.16	2.46083e-10	9.82191e-06	7.79542e-08	3.02633e-12	1.57	0.32	6.05	1.25	-4.48	-5.73
cg17403084	12	PXN	TSS1500	S_Shore	21.34	2.93	20.09	2.97	23.15	2.23	19.67	3	3.20285e-10	0.00256448	3.93017e-07	2.69649e-12	1.67	0.42	3.48	1.25	-1.81	-3.06
cg10001186	11		intergenic	N_Shore	50.05	4.99	47.72	5.28	53.15	4.55	47.02	5.27	3.23693e-10	0.00430388	3.53056e-07	3.1966e-12	3.03	0.7	6.13	2.33	-3.1	-5.43
cg01542019	19	TECR	Body	N_Shelf	55.35	5.54	53.48	6.13	58.17	4.82	51.25	5.81	6.60262e-10	0.0236551	0.000107457	1.9527e-12	4.1	2.23	6.92	1.87	-2.82	-4.69
cg08468401	3		intergenic	open_sea	20.52	4.76	18.33	4.53	22.9	4.3	17.32	4.96	7.79015e-10	0.0275169	7.34389e-06	8.72986e-12	3.2	1.01	5.58	2.19	-2.38	-4.57
cg11135072	12		intergenic	open_sea	16.17	3.53	15.36	3.35	18.79	3.41	14.55	3.34	8.00265e-10	0.000158253	4.03198e-06	1.63371e-12	1.62	0.81	4.24	0.81	-2.62	-3.43
cg09300179	15	SEMA7A	TSS1500	S_Shore	29.18	3.06	28.01	3.54	30.94	2.55	27.29	3.01	1.25931e-09	0.0153535	6.64656e-06	4.81744e-12	1.89	0.72	3.65	1.17	-1.76	-2.93
cg21572722	6	ELOVL2	TSS1500	Island	39.52	4.04	41.41	4.1	37.67	3.53	42.43	4.37	1.55829e-09	0.0217709	7.14854e-06	2.53706e-11	-2.91	-1.02	-4.76	-1.89	1.85	3.74
cg07430714	13	FAM124A	Body	open_sea	60.23	5.63	58.54	5.64	63.91	4.31	57.31	5.97	2.00234e-09	0.000780687	3.3267e-06	6.30855e-12	2.92	1.23	6.6	1.69	-3.68	-5.37
cg27099280	15	CELF6	1stExon	Island	12.18	2.97	13.63	3.06	10.69	2.6	14.47	3.98	2.04355e-09	0.0259226	4.42553e-06	2.09498e-11	-2.29	-0.84	-3.78	-1.45	1.49	2.94
cg16930016	1		intergenic	open_sea	45.07	4.23	43.34	4.59	47.22	4.01	42.22	4.1	2.32919e-09	0.035661	1.94607e-05	1.20006e-11	2.85	1.12	5	1.73	-2.15	-3.88
cg07553761	3	TRIM59	TSS1500	Island	45.52	5.31	46.78	5.34	42.78	4.57	49.49	6.5	2.47577e-09	0.00831333	0.000735634	7.65367e-12	-3.97	-2.71	-6.71	-1.26	2.74	4
cg20868633	9	HRCT1	TSS200	open_sea	51.59	8.17	50.97	7.08	58.47	6.07	51.07	7.48	3.32223e-09	1.66412e-06	5.17514e-07	2.90251e-10	0.52	-0.1	7.4	0.62	-6.88	-7.5
cg14692377	17	SLC6A4	1stExon;5'UTR	Island	18.52	2.95	18.96	3.03	16.61	2.25	20.03	3	3.43766e-09	0.00048965	8.97306e-05	3.61629e-12	-1.51	-1.07	-3.42	-0.44	1.91	2.35
cg22872396	2	SCN9A	5'UTR	open_sea	70.93	6.87	67.02	7.94	75.35	6.9	66.11	9.25	3.44276e-09	0.00194034	3.1033e-07	7.15963e-11	4.82	0.91	9.24	3.91	-4.42	-8.33
cg16618104	12	CHST11	Body	S_Shore	11.92	3.1	10.62	3.61	14.55	3.26	11.32	3.33	4.56333e-09	0.000107969	1.21864e-09	7.63868e-09	0.6	-0.7	3.23	1.3	-2.63	-3.93
cg25694915	2	NOSTRIN	5'UTR;TSS200	open_sea	79.63	4.57	78.08	4.19	81.97	3.9	76.53	5.75	5.13724e-09	0.00119747	8.90263e-06	4.07973e-11	3.1	1.55	5.44	1.55	-2.34	-3.89
cg24279897	12	LOC100507065	Body	open_sea	60.06	4.97	58.46	5.47	62.99	3.94	57.45	4.52	5.47144e-09	0.00313137	7.51194e-06	1.84672e-11	2.61	1.01	5.54	1.6	-2.93	-4.53
cg11826475	12	PXN	TSS1500	S_Shore	23.69	2.64	22.57	2.94	25.28	2.32	22.25	2.57	6.02413e-09	0.00630409	1.20078e-06	6.3728e-11	1.44	0.32	3.03	1.12	-1.59	-2.71
cg21548231	3	CMTM8	Body	open_sea	34.73	4.91	33.56	5.38	38.47	4.5	32.68	4.67	6.09811e-09	0.000165401	2.96147e-06	2.19899e-11	2.05	0.88	5.79	1.17	-3.74	-4.91
cg26161329	17	PPM1E	TSS1500	Island	19.93	2.27	20.46	2.3	18.45	2.15	21.54	3.19	6.9265e-09	0.00158662	0.000152252	1.15102e-11	-1.61	-1.08	-3.09	-0.53	1.48	2.01
cg03172931	19		intergenic	S_Shelf	72.6	3.74	71.2	3.53	74.78	2.43	70.53	4.35	7.14522e-09	0.00622619	3.8093e-06	3.92486e-11	2.07	0.67	4.25	1.4	-2.18	-3.58
cg18568497	12	SLC2A13	Body	open_sea	43.34	4.4	41.5	5.3	45.96	4.11	40.54	4.92	8.48991e-09	0.00794037	6.85949e-06	5.71972e-11	2.8	0.96	5.42	1.84	-2.62	-4.46
cg06933824	5	NEURL1B	Body	Island	65.7	4.92	67.31	5.57	63.09	4.93	69.28	5.83	8.54971e-09	0.0145244	0.000229963	3.94872e-11	-3.58	-1.97	-6.19	-1.61	2.61	4.22

## Sheet: 9D. 8 sites in MARD-MRS
Table S9. DNA methylation levels of the 95 subgroup-unique sites included in the subgroup-unique methylation risk scores (MRSs) in the ANDIS discovery cohort.
Table 9D. DNA methylation levels of the 8 sites included in MARD-MRS.
					ANDIS discovery cohort (n=280)
					SIDD (n=78)		SIRD (n=47)		MOD (n=67)		MARD (n=88)						Methylation differences between subgroups
TargetID	Chr	Gene	Gene region	CpG island group	Mean	SD	Mean	SD	Mean	SD	Mean	SD	ANCOVA q-value	p-value MARD vs. SIDD	p-value MARD vs. SIRD	p-value MARD vs. MOD	SIDD-MARD	SIRD-MARD	MOD-MARD	SIDD- SIRD	SIDD-MOD	SIRD-MOD
cg01486610	8	RNF170	5'UTR;Body	N_Shelf	64.08	5.66	62.86	5.52	66.38	4.66	59.64	6.01	2.51962e-09	9.7607e-06	0.0151789	1.01383e-11	4.44	3.22	6.74	1.22	-2.3	-3.52
cg02003457	7	HECW1	Body	S_Shore	91.05	2.09	91.13	2.15	92.03	1.87	89.89	2.62	1.72006e-05	0.00235561	0.0114516	2.4163e-08	1.16	1.24	2.14	-0.08	-0.98	-0.9
cg22777186	11	PKNOX2	5'UTR	open_sea	76.83	3.27	76.04	3.8	77.44	2.74	74.38	3.68	1.76743e-05	6.63695e-06	0.0279434	3.13064e-07	2.45	1.66	3.06	0.79	-0.61	-1.4
cg08076830	18		intergenic	Island	28.16	3.28	28.34	3.45	28.56	3.2	31.33	4.83	3.4043e-05	9.1915e-06	0.000334123	0.000183276	-3.17	-2.99	-2.77	-0.18	-0.4	-0.22
cg21383487	10		intergenic	Island	14	2.81	14.28	3.13	12.97	2.43	15.83	3.61	4.06634e-05	0.0019335	0.0444513	1.64297e-07	-1.83	-1.55	-2.86	-0.28	1.03	1.31
cg07963234	4	CRMP1	TSS200	Island	15	3.21	15.04	2.83	13.88	2.31	16.74	3.59	6.84772e-05	0.00707835	0.0407113	3.314e-07	-1.74	-1.7	-2.86	-0.04	1.12	1.16
cg14532755	4		intergenic	N_Shelf	64.92	5.17	64.87	4.49	66.68	3.95	62.54	4.5	0.000103338	0.00976806	0.0458338	4.27812e-07	2.38	2.33	4.14	0.05	-1.76	-1.81
cg09787690	18	LOC101927229	Body	open_sea	48.6	6.89	49.03	6.63	51.95	9.23	45.16	6.86	0.000117936	0.0171778	0.0268404	3.16655e-07	3.44	3.87	6.79	-0.43	-3.35	-2.92
